# Supplementary material
Source: publisher figshare collection journal article supplement (https://karger.figshare.com/articles/dataset/_/3996360)

**Figure 2:** Pedigrees and Haplotypes of VP families with other mutations

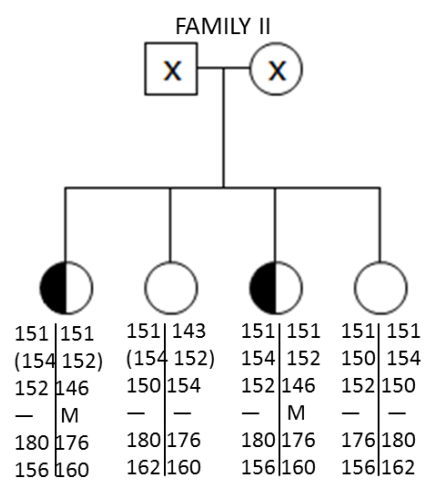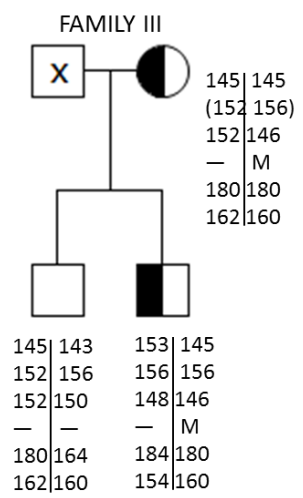

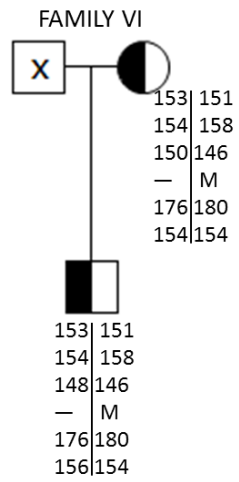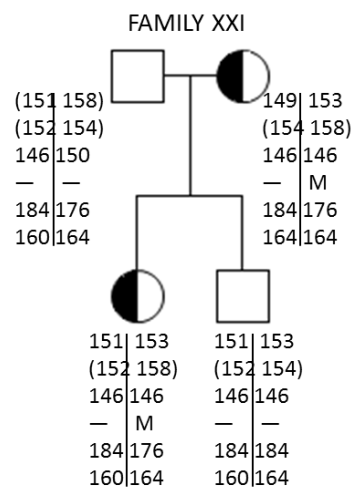

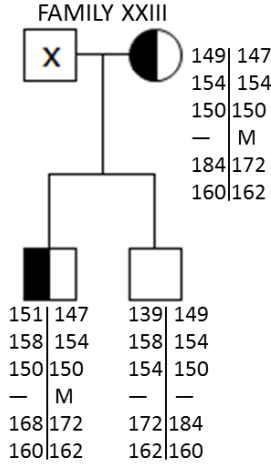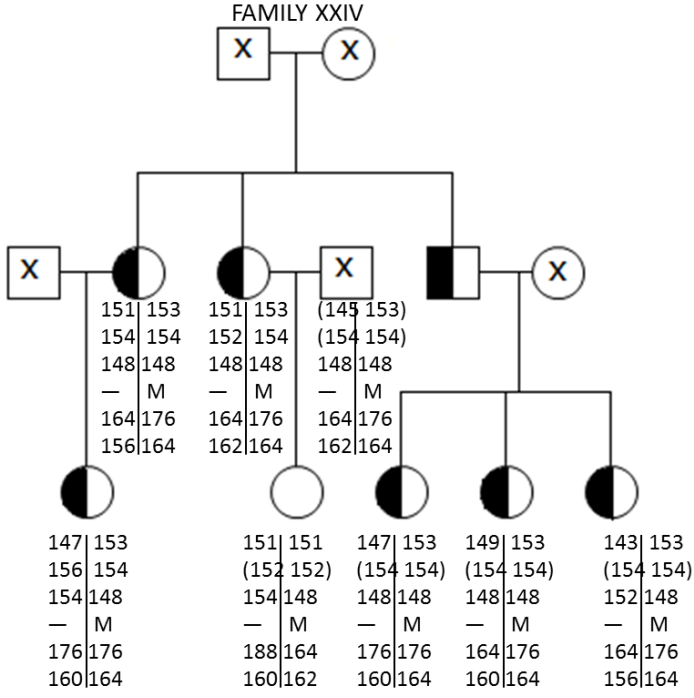

# FAMILY XXVI

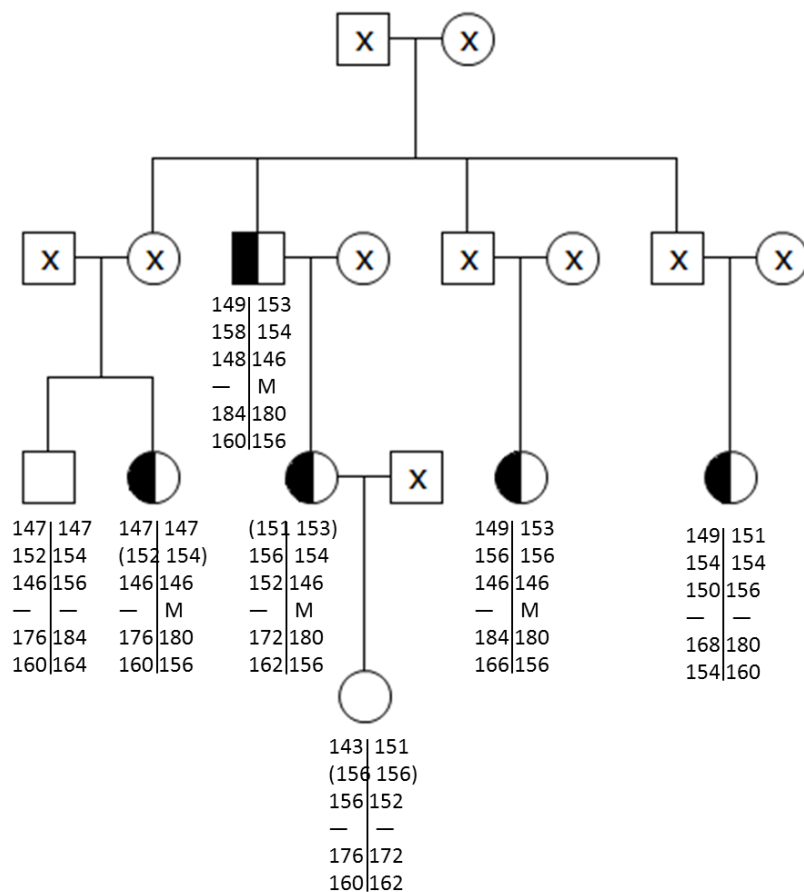

# FAMILY XXX

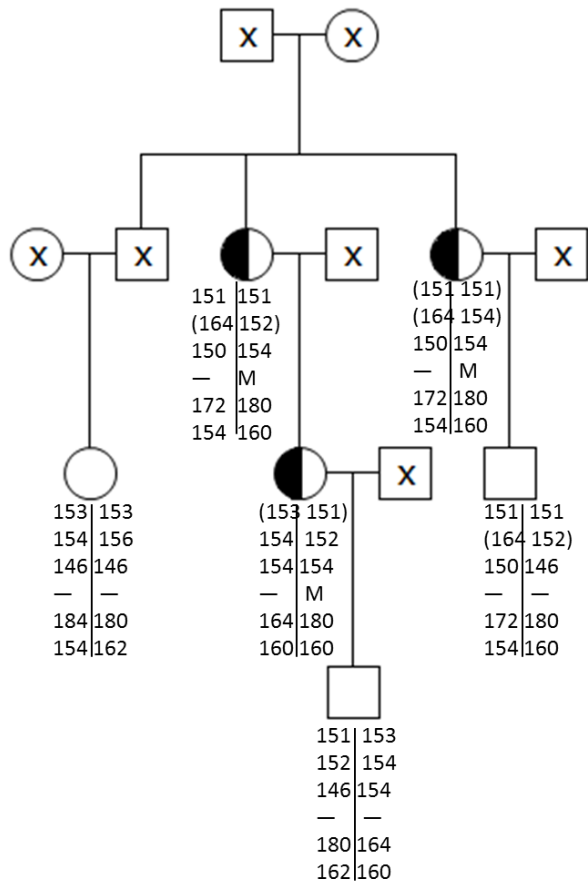

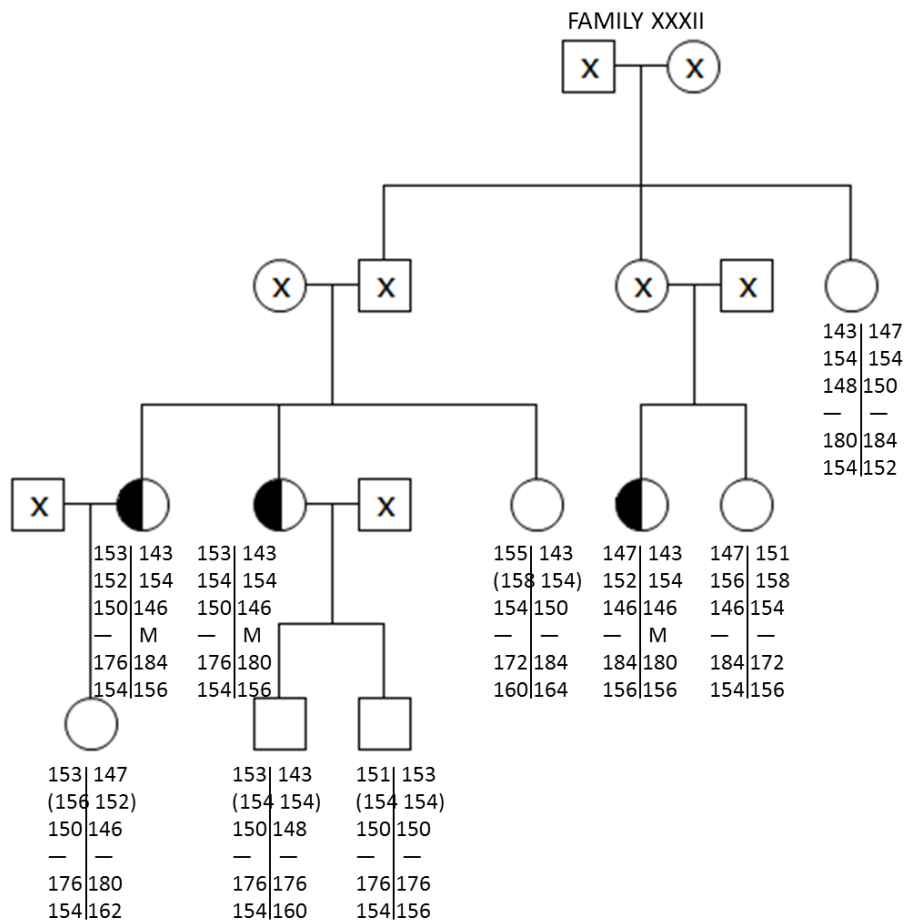

FAMILY XXXIII

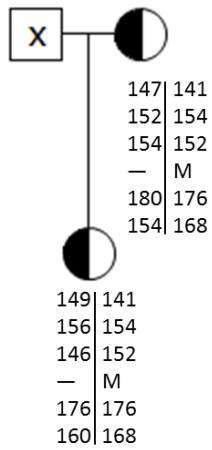

FAMILY XXXIV

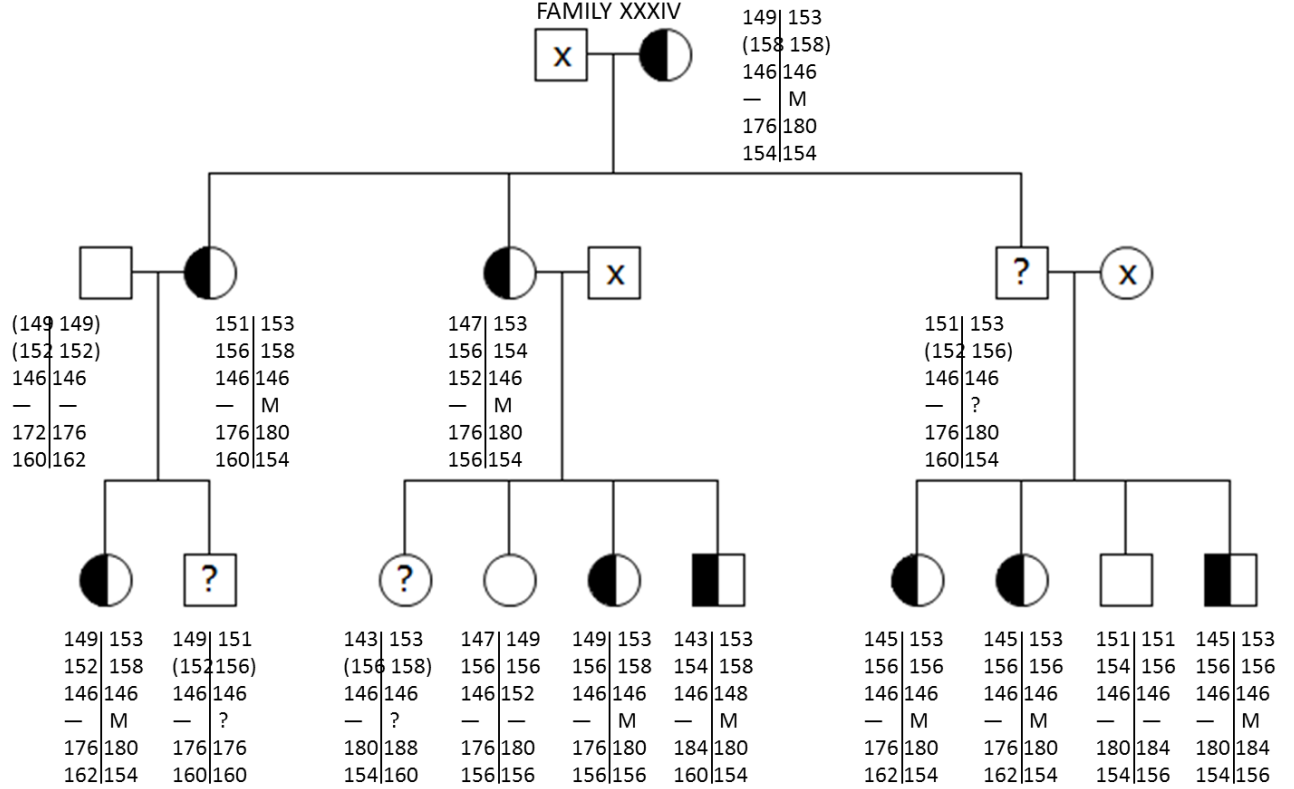

Supplement: Supplementary file 1 [file 1]
