# Supplementary material
Source: publisher figshare collection journal article supplement (https://karger.figshare.com/articles/dataset/_/3996360)
Supplement: Supplementary file 3 [file 1]

Archive with 7 entries (7 files):
- F1Supp.pdf
- F2Supp.pdf
- T1.doc
- T2.doc
- T3.doc
- T4.doc
- T5.doc
