# Supplementary material
Source: publisher figshare collection journal article supplement (https://karger.figshare.com/articles/dataset/_/3996360)

**Figure 1:** Pedigrees and Haplotypes of VP families with the insertion

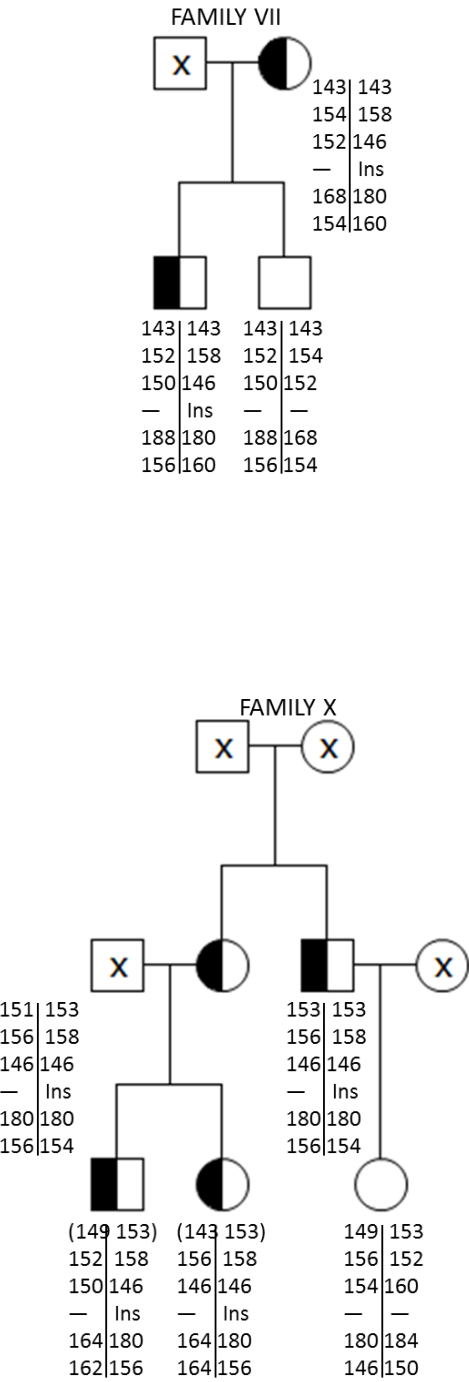

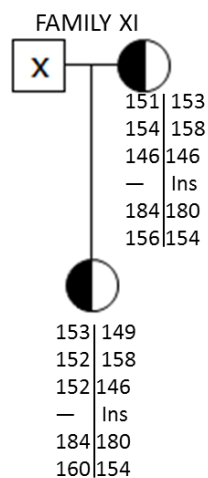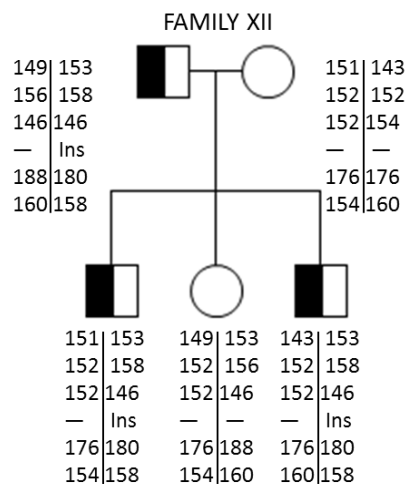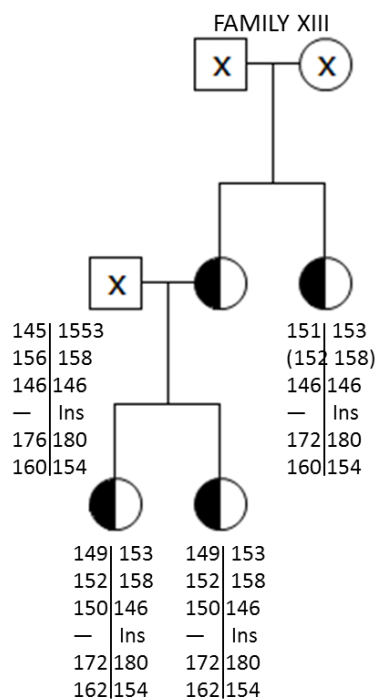

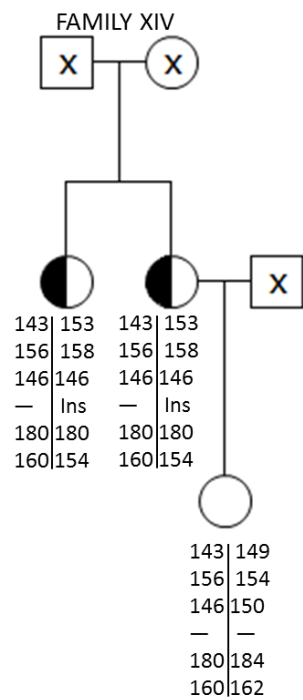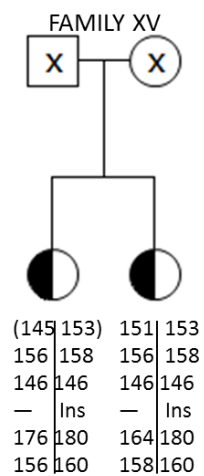

Supplement: Supplementary file 2 [file 1]
